# Supplementary material for: Distribution bias and biochemical characterization of TOP1MT single nucleotide variants
Source: PubMed Central journal article supplement (PMC5561071; doi:10.1038/s41598-017-09258-2), 2017-08-17
Supplement: 41598_2017_9258_MOESM1_ESM.pdf [file 41598_2017_9258_MOESM1_ESM.pdf]

## **Distribution bias and biochemical characterization of *TOP1MT* single nucleotide variants**

Hongliang Zhang<sup>1</sup>, Yeonee Seol<sup>2</sup>, Keli Agama<sup>1</sup>, Keir C. Neuman<sup>2</sup>, and Yves Pommier<sup>1\*</sup>

<sup>1</sup>Laboratory of Molecular Pharmacology, Developmental Therapeutics Branch, Center for Cancer Research, NCI, National Institutes of Health, Bethesda, MD, 20892, USA

<sup>2</sup>Laboratory of Single Molecule Biophysics, NHLBI, National Institutes of Health, Bethesda, MD, 20892, USA

\*For correspondence: [pommier@nih.gov](mailto:pommier@nih.gov)

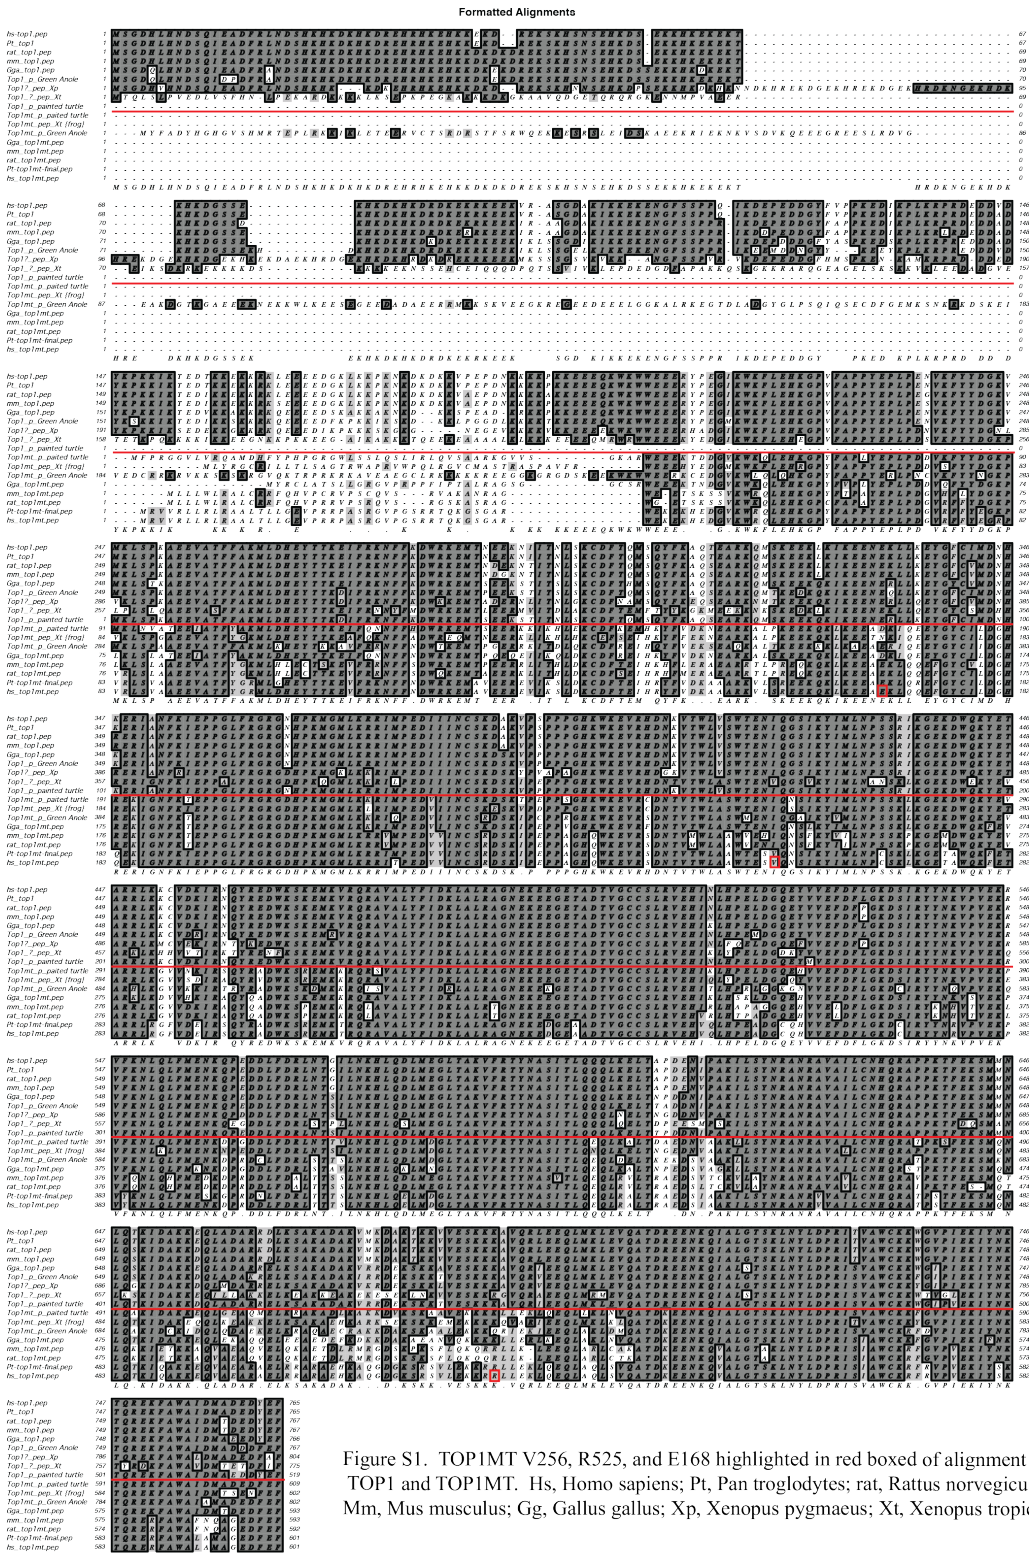

Figure S1. TOP1MT V256, R525, and E168 highlighted in red boxed of alignment of TOP1 and TOP1MT. Hs, Homo sapiens; Pt, Pan troglodytes; rat, Rattus norvegicus; Mm, Mus musculus; Gg, Gallus gallus; Xp, Xenopus pygmaeus; Xt, Xenopus tropicalis.

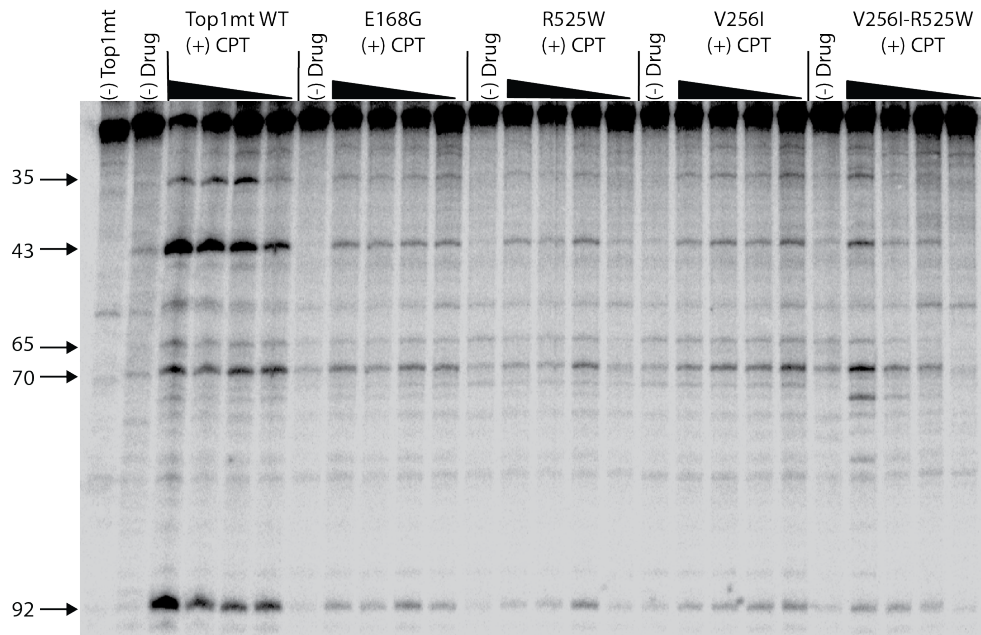

Figure S2. Cleavage assay of purified Top1mt mutant proteins: (lane 1) DNA alone; (lane 2) Top1mt alone; (lane 3-6) 1:3 fold serial dilution of Top1mt incubated with 1  $\mu$ M camptothecin; (lane 7) E168G Top1mt alone; (lanes 8-11) 1:3 fold serial dilution of E168G Top1mt incubated with 1  $\mu$ M camptothecin; (lane 12) R525W Top1mt alone; (lane 13-16) 1:3 fold serial dilution of R525W Top1mt incubated with 1  $\mu$ M camptothecin; (lane 17) V256I Top1mt alone; (lane 18-21) 1:3 fold serial dilution of V256I Top1mt incubated with 1  $\mu$ M camptothecin; (lane 22) R525W-V256I Top1mt alone; (lane 23-26) 1:3 fold serial dilution of R525W-V256I Top1mt incubated with 1  $\mu$ M camptothecin.
